# On the Modulus in Matching Vector Codes

LIN ZHU, WEN MING LI AND LIANG FENG ZHANG\*

*School of Information Science and Technology, ShanghaiTech University, Shanghai 201210, China*

*\*Corresponding author: zhanglf@shanghaitech.edu.cn*

**A  $k$ -query locally decodable code (LDC)  $C$  allows one to encode any  $n$ -symbol message  $x$  as a codeword  $C(x)$  of  $N$  symbols such that each symbol of  $x$  can be recovered by looking at  $k$  symbols of  $C(x)$ , even if a constant fraction of  $C(x)$  has been corrupted. Currently, the best known LDCs are matching vector codes (MVCs). A modulus  $m = p_1^{\alpha_1} p_2^{\alpha_2} \cdots p_r^{\alpha_r}$  may result in an MVC with  $k \leq 2^r$  and  $N = \exp(\exp(O((\log n)^{1-1/r}(\log \log n)^{1/r})))$ . The  $m$  is good if it is possible to have  $k < 2^r$ . The good numbers yield more efficient MVCs. Prior to this work, there are only finitely many good numbers. All of them were obtained via computer search and have the form  $m = p_1 p_2$ . In this paper, we study good numbers of the form  $m = p_1^{\alpha_1} p_2^{\alpha_2}$ . We show that if  $m = p_1^{\alpha_1} p_2^{\alpha_2}$  is good, then any multiple of  $m$  of the form  $p_1^{\beta_1} p_2^{\beta_2}$  must be good as well. Given a good number  $m = p_1^{\alpha_1} p_2^{\alpha_2}$ , we show an explicit method of obtaining smaller good numbers that have the same prime divisors. Our approach yields infinitely many new good numbers.**

*Keywords: matching vector codes; locally decodable codes; private information retrieval*

*Received 2 October 2020; Revised 9 June 2021; Editorial Decision 20 July 2021*

*Handling editor: Dirk Sudholt*

## 1. INTRODUCTION

Classical error-correcting codes allow one to encode any  $n$ -bit message  $x$  as an  $N$ -bit codeword  $C(x)$  such that  $x$  can still be recovered, even if a constant fraction of  $C(x)$  has been corrupted. The disadvantage of such codes is that one has to read all or most of the codeword to recover any information about  $x$ . As a better solution for decoding particular bits of the message, a  $(k, \delta, \epsilon)$ -locally decodable code (LDC) [1] encodes any  $n$ -bit message  $x$  to an  $N$ -bit codeword, such that any message bit  $x_i$  can be recovered with probability  $\geq 1 - \epsilon$ , by a randomized decoding procedure that makes at most  $k$  queries, even if  $\delta N$  bits of  $C(x)$  have been corrupted. Such codes have interesting applications [2, 3] in cryptography and complexity theory. For an efficient LDC, both the code length  $N$  and the query complexity  $k$  should be as small as possible, as functions of  $n$ .

Following [1, 4, 5], Gasarch [2] and Goldreich *et al.* [4] conjectured that for any constant  $k$ , the length  $N$  of a  $k$ -query LDC should be  $\exp(n^{\Omega(1)})$ . Yekhanin [6] disproved this conjecture with a three-query LDC of length  $\exp(\exp(O(\log n / \log \log n)))$ , assuming that there are infinitely many Mersenne primes. For any  $r \geq 2$ , Efremenko [7] provided a construction of  $2^r$ -query LDCs of length  $N_r =$

$\exp(\exp(O((\log n)^{1-1/r}(\log \log n)^{1/r})))$  under no assumptions, and in particular a three-query LDC when  $r = 2$ . Such codes have been reformulated and called *matching vector codes* (MVCs) in [8].

The MVCs in [7] are based on two ingredients:  $S$ -matching family and  $S$ -decoding polynomial. For  $r \geq 2$ , let  $\mathcal{M}_r$  be the set of integers of the form  $m = p_1^{\alpha_1} p_2^{\alpha_2} \cdots p_r^{\alpha_r}$ , where  $p_1, p_2, \dots, p_r > 2$  are distinct primes and  $\alpha_1, \alpha_2, \dots, \alpha_r > 0$ . The existence of both ingredients in MVCs depends on a modulus  $m \in \mathcal{M}_r$ . In particular, the query complexity  $k$  of the MVC is equal to the number of monomials in the  $S$ -decoding polynomial and is at most  $2^r$  for all  $m \in \mathcal{M}_r$ . A number  $m \in \mathcal{M}_r$  has been called *good* if an  $S$ -decoding polynomial with  $k < 2^r$  monomials exists when  $m$  is used to construct MVC. For example, the three-query LDC of [7] was constructed with the good number  $m = 7 \times 73$ . Itoh and Suzuki [9] showed that one can reduce the query complexity of MVCs via a composition theorem. In particular, by using the good numbers 511 and 2047, they were able to obtain  $9 \cdot 2^{r-4}$ -query LDC of length  $N_r$  for all  $r > 5$ . Chee *et al.* [10] showed that if there exist primes  $t, p_1, p_2$  such that  $m = 2^t - 1 = p_1 p_2$ , then  $m$  must be good. They determined 50 new good numbers of the above form and then significantly reduced the query complexity of MVCs.

Since [7, 9, 10], the work of finding good numbers has become interesting. However, the study of [7, 9, 10] was limited to good numbers of the form  $m = p_1 p_2 \in \mathcal{M}_2$ . When  $\max\{\alpha_1, \alpha_2\} > 1$ , it is not known how to decide a number of the form  $m = p_1^{\alpha_1} p_2^{\alpha_2} \in \mathcal{M}_2$  is good except using the very expensive computer search. In this paper, we shall provide two methods for obtaining new good numbers in  $\mathcal{M}_2$ :

- If  $m_1 = p_1^{\alpha_1} p_2^{\alpha_2} \in \mathcal{M}_2$  is good and  $m_2 = p_1^{\beta_1} p_2^{\beta_2} \in \mathcal{M}_2$  is a multiple of  $m_1$ , then  $m_2$  must be good as well.
- If  $m_2 = p_1^{\beta_1} p_2^{\beta_2} \in \mathcal{M}_2$  is good, and there is an  $S$ -decoding polynomial of the form  $P(X) = X^u + aX^v + b$  for  $m_2$  such that  $\gcd(u, v, m_2) = p_1^{\omega_1} p_2^{\omega_2}$ , then  $m_1 = m_2 / (p_1^{\omega_1} p_2^{\omega_2})$  must be good as well.

## 2. PRELIMINARIES

We denote by  $\mathbb{Z}$  and  $\mathbb{Z}^+$  the set of integers and positive integers, respectively. For any  $n \in \mathbb{Z}^+$ , we denote  $[n] = \{1, 2, \dots, n\}$ . For any  $m \in \mathbb{Z}^+$ , we denote by  $\mathbb{Z}_m$  the set of integers modulo  $m$  and denote by  $\mathbb{Z}_m^*$  the multiplicative group of integers modulo  $m$ . When  $m$  is odd, we have that  $2 \in \mathbb{Z}_m^*$  and denote by  $\text{ord}_m(2)$  the multiplicative order of 2 in  $\mathbb{Z}_m^*$ . For a prime power  $q$ , we denote by  $\mathbb{F}_q$  the finite field of  $q$  elements and denote by  $\mathbb{F}_q^*$  the multiplicative group of  $\mathbb{F}_q$ . For any  $z \in \mathbb{F}_q^*$ , we denote by  $\text{ord}_q(z)$  the multiplicative order of  $z$ . For any two vectors  $x = (x_1, \dots, x_n), y = (y_1, \dots, y_n)$ , we denote by  $d_H(x, y) = \{i : i \in [n], x_i \neq y_i\}$  the *Hamming distance* between  $x$  and  $y$ . For any  $x, y \in \mathbb{Z}_m^h$ , we denote by  $\langle x, y \rangle_m = \sum_{i=1}^n x_i y_i \pmod{m}$  the dot product of  $x$  and  $y$ . If the components of a vector  $y$  are labeled by a set  $V$ , then for every  $v \in V$  we denote by  $y[v]$  the  $v$ th component of  $y$ .

**DEFINITION 2.1. (locally decodable code)** Let  $k, n, N \in \mathbb{Z}^+$  and let  $0 \leq \delta, \epsilon \leq 1$ . A code  $C : \mathbb{F}_q^n \rightarrow \mathbb{F}_q^N$  is said to be  $(k, \delta, \epsilon)$ -locally decodable if there exist randomized decoding algorithms  $D_1, D_2, \dots, D_n$  such that:

- For any  $x \in \mathbb{F}_q^n$ , any  $y \in \mathbb{F}_q^N$  such that  $d_H(C(x), y) \leq \delta N$  and any  $i \in [n]$ ,  $\Pr[D_i(y) = x_i] \geq 1 - \epsilon$ .
- The algorithm  $D_i$  makes at most  $k$  queries to  $y$ .

The numbers  $k$  and  $N$  are called the *query complexity* and the *length* of  $C$ , respectively. They are usually considered as functions of  $n$ , the *message length*, and measure the efficiency of  $C$ . Ideally, we would like  $k$  and  $N$  to be as small as possible.

Efremenko [7] proposed a construction of LDCs, which is based on two fundamental building blocks: *S-matching family* and *S-decoding polynomial*.

**DEFINITION 2.2. (S-matching family)** Let  $m, h, n \in \mathbb{Z}^+$  and let  $S \subseteq \mathbb{Z}_m \setminus \{0\}$ . A set  $\mathcal{U} = \{u_i\}_{i=1}^n \subseteq \mathbb{Z}_m^h$  is said to be an *S-matching family* if

**Encoding:** This algorithm encodes any message  $x = (x_1, \dots, x_n) \in \mathbb{F}_2^n$  as a codeword  $C(x) \in \mathbb{F}_2^{m^h}$  such that:

- the  $m^h$  components of  $C(x)$  are labeled by the  $m^h$  elements of  $\mathbb{Z}_m^h$  respectively; and
- for every  $v \in \mathbb{Z}_m^h$ , the  $v$ th component is computed as  $C(x)[v] = \sum_{j=1}^n x_j \cdot \gamma^{\langle u_j, v \rangle_m}$ .

**Decoding:** This algorithm takes a word  $y \in \mathbb{F}_2^{m^h}$  and an integer  $i \in [n]$  as input. It recovers  $x_i$  as follows:

- choose a vector  $v \in \mathbb{Z}_m^h$  uniformly and at random.
- output  $\gamma^{-\langle u_i, v \rangle_m} \cdot (a_0 \cdot y[v] + \sum_{\ell=1}^{k-1} a_\ell \cdot y[v + b_\ell u_i])$ .

FIGURE 1. Efremenko's construction.

- $\langle u_i, u_i \rangle_m = 0$  for every  $i \in [n]$ ,
- $\langle u_i, u_j \rangle_m \in S$  for all  $i, j \in [n]$  such that  $i \neq j$ .

**DEFINITION 2.3. (S-decoding polynomial)** Let  $m \in \mathbb{Z}^+$  be odd. Let  $t = \text{ord}_m(2)$  and let  $\gamma \in \mathbb{F}_{2^t}^*$  be a primitive  $m$ th root of unity. A polynomial  $P(X) \in \mathbb{F}_{2^t}[X]$  is said to be an *S-decoding polynomial* if

- $P(\gamma^s) = 0$  for every  $s \in S$ ,
- $P(\gamma^0) = 1$ .

Given an  $S$ -matching family  $\mathcal{U} = \{u_i\}_{i=1}^n \subseteq \mathbb{Z}_m^h$  and an  $S$ -decoding polynomial  $P(X) = a_0 + a_1 X^{b_1} + \dots + a_{k-1} X^{b_{k-1}} \in \mathbb{F}_{2^t}[X]$ , Efremenko's LDC can be described in **Figure 1**.

Efremenko's construction gives a linear  $(k, \delta, k\delta)$ -LDC that encodes messages of length  $n$  to codewords of length  $N = m^h$ . When  $N$  is fixed, the larger the  $n$  is, the more efficient the  $C$  is. Efremenko [7] and several later works [9, 10] choose  $S$  as the canonical set in  $\mathbb{Z}_m$ . For any  $m = p_1^{\alpha_1} p_2^{\alpha_2} \dots p_r^{\alpha_r} \in \mathcal{M}_r$ , the canonical set in  $\mathbb{Z}_m$  is defined as

$$S_m = \{s_\sigma : \sigma \in \{0, 1\}^r \setminus \{0^r\}, s_\sigma \equiv \sigma_i \pmod{\sim p_i^{\alpha_i}}, \forall i \in [r]\}.$$

For example,  $S_{15} = \{1, 6, 10\}$ . Efremenko [7] observed that Grolmusz's set system [11] gives a direct construction of  $S_m$ -matching families.

**LEMMA 2.1. ([7, 11])** For any  $m \in \mathcal{M}_r (r \geq 2)$  and integer  $h > 0$ , there is an  $S_m$ -matching family  $\mathcal{U} = \{u_i\}_{i=1}^n \subseteq \mathbb{Z}_m^h$  of size  $n \geq \exp(c(\log h)^r / (\log \log h)^{r-1})$ , where  $c$  is a constant that only depends on  $m$ .

In particular, the  $n$  takes the form of  $\ell^\ell$  for an integer  $\ell > 0$  and  $h$  is determined by both  $m, \ell$ , and the weak representation of the function  $\text{OR}_\ell$  [11]. Efremenko [7] also observed that the

polynomial  $P(X) = \prod_{s \in S_m} (X - \gamma^s) / (1 - \gamma^s)$  is an  $S_m$ -decoding polynomial with  $k \leq 2^r$  monomials.

LEMMA 2.2. ([7]) *For any  $m \in \mathcal{M}_r$  ( $r \geq 2$ ), there is an  $S_m$ -decoding polynomial with at most  $2^r$  monomials.*

Lemmas 2.1 and 2.2 yield LDCs of subexponential length.

THEOREM 2.1. ([7]) *For every integer  $r \geq 2$ , there is a  $(k, \delta, k\delta)$ -LDC of query complexity  $k \leq 2^r$  and length  $N_r$ .*

For every integer  $r \geq 2$ , Theorem 2.1 gives an infinite family of LDCs, each based on a number  $m \in \mathcal{M}_r$ . Different  $m \in \mathcal{M}_r$  may give LDCs of different query complexity. For example,  $m = 7 \times 73$  gives a code of query complexity 3 [7], while  $m = 3 \times 5$  is only able to give a code of query complexity 4 [9]. A number of the form  $m = p_1 p_2$  has been called *good* in [9, 10] if it is able to result in an LDC of query complexity  $< 4$ . By using the good numbers 511 and 2047, Itoh and Suzuki [9] concluded that for any  $r > 5$ , the query complexity  $2^r$  of the LDCs in Theorem 2.1 can be reduced to  $9 \cdot 2^{r-4}$ . On the other hand, for  $r = 2, 3, 4$  and  $5$ , the best decoding algorithms to date for the LDCs in Theorem 2.1 have query complexity 3, 8, 9 and 24, respectively. Chee *et al.* [10] showed that Mersenne numbers of the form  $p_1 p_2$  are good. With infinitely many such good numbers, Chee *et al.* [10] can further reduce the query complexity to  $3^{r/2}$ .

### 3. GOOD NUMBERS OF THE FORM $p_1^{\alpha_1} p_2^{\alpha_2}$

Let  $m = p_1^{\alpha_1} p_2^{\alpha_2} \in \mathcal{M}_2$ . Let  $t = \text{ord}_m(2)$  and let  $\gamma \in \mathbb{F}_{2^t}^*$  be a primitive  $m$ th root of unity. Lemma 2.2 shows that there is an  $S_m$ -decoding polynomial  $P(X)$  with  $k \leq 4$  monomials. In this section, we will establish several sufficient and necessary conditions for a number  $m$  to be good.

LEMMA 3.1. *Let  $m = p_1^{\alpha_1} p_2^{\alpha_2} \in \mathcal{M}_2$ . Then any  $S_m$ -decoding polynomial has  $\geq 3$  monomials.*

*Proof.* If  $P(X) = aX^u \in \mathbb{F}_{2^t}[X]$  is an  $S_m$ -decoding polynomial, then  $a = P(1) = 1$  and  $a = \gamma^{-u} P(\gamma) = 0$ , which give a contradiction. If  $P(X) = aX^u + bX^v \in \mathbb{F}_{2^t}[X]$  is an  $S_m$ -decoding polynomial with 2 monomials, then  $ab \neq 0$  and

$$a\gamma^{us_{01}} + b\gamma^{vs_{01}} = P(\gamma^{s_{01}}) = 0, \quad (1)$$

$$a\gamma^{us_{10}} + b\gamma^{vs_{10}} = P(\gamma^{s_{10}}) = 0, \quad (2)$$

$$a + b = P(1) = 1. \quad (3)$$

Equations (1) and (2) imply that  $b/a = \gamma^{(u-v)s_{01}} = \gamma^{(u-v)s_{10}}$ . As  $\text{ord}_{2^t}(\gamma) = m$ , we must have that

$$(u - v)(s_{01} - s_{10}) \equiv 0 \pmod{m}. \quad (4)$$

Note that  $\text{gcd}(s_{01} - s_{10}, m) = 1$ . Equation (4) implies  $u \equiv v \pmod{m}$ . It follows that  $b/a = \gamma^{(u-v)s_{01}} = 1$  and thus  $a + b = 0$ , which contradicts to (3). ■

Let  $\mathbb{M}_2$  be the set of good numbers in  $\mathcal{M}_2$ . The following lemmas characterize  $\mathbb{M}_2$ .

LEMMA 3.2. *Let  $m = p_1^{\alpha_1} p_2^{\alpha_2} \in \mathcal{M}_2$ . Then  $m \in \mathbb{M}_2$  if and only if there is a polynomial  $Q(X) = X^u + aX^v + b \in \mathbb{F}_{2^t}[X]$  that satisfies the following properties*

- ①  $ab \neq 0$ ,
- ②  $|\{(u \bmod m), (v \bmod m), 0\}| = 3$ , and
- ③  $Q(\gamma) = Q(\gamma^{s_{01}}) = Q(\gamma^{s_{10}}) = 0, Q(1) \neq 0$ .

*Proof.* If  $m \in \mathbb{M}_2$ , then by Lemma 3.1 there exists an  $S_m$ -decoding polynomial

$$P(X) = c_1 X^{d_1} + c_2 X^{d_2} + c_3 X^{d_3} \in \mathbb{F}_{2^t}[X] \quad (5)$$

with exactly three monomials. In particular, we must have

- ④  $c_1 c_2 c_3 \neq 0$ ,
- ⑤  $|\{(d_1 \bmod m), (d_2 \bmod m), (d_3 \bmod m)\}| = 3$ , and
- ⑥  $P(\gamma^{s_{01}}) = P(\gamma^{s_{10}}) = P(\gamma) = 0, P(1) = 1$ .

While ④ and ⑥ are clear from the definition, we show that ⑤ is also true. Assume for contradiction that  $d_1 \equiv d_2 \pmod{m}$ . Then  $(\gamma^s)^{d_1} = (\gamma^s)^{d_2}$  for all  $s \in \{s_{01}, s_{10}, 1\}$  and thus

$$(c_1 + c_2)\gamma^{s_{01}d_1} + c_3\gamma^{s_{01}d_3} = P(\gamma^{s_{01}}) = 0, \quad (6)$$

$$(c_1 + c_2)\gamma^{s_{10}d_1} + c_3\gamma^{s_{10}d_3} = P(\gamma^{s_{10}}) = 0, \quad (7)$$

$$c_1 + c_2 + c_3 = P(1) = 1. \quad (8)$$

Due to (6) and (7), we have that  $\gamma^{s_{01}(d_3-d_1)} = \gamma^{s_{10}(d_3-d_1)}$  and thus  $d_1 \equiv d_3 \pmod{m}$ . Consequently, (6) implies that  $c_1 + c_2 + c_3 = 0$ , which contradicts to (8).

W.l.o.g., we suppose that  $d_1 > d_2 > d_3$ . Let  $u = d_1 - d_3, v = d_2 - d_3, a = c_2/c_1$  and  $b = c_3/c_1$ . Then

$$Q(X) := X^u + aX^v + b = \frac{P(X)}{c_1 X^{d_3}}. \quad (9)$$

The properties ①, ② and ③ trivially follow from ④, ⑤ and ⑥, respectively.

Conversely, suppose that  $Q(X) = X^u + aX^v + b$  is a polynomial that satisfies the properties ①, ② and ③. Then  $P(X) = Q(X)/Q(1)$  will be an  $S_m$ -decoding polynomial with exactly three monomials. Therefore,  $m \in \mathbb{M}_2$ . ■

LEMMA 3.3. *Let  $m = p_1^{\alpha_1} p_2^{\alpha_2} \in \mathcal{M}_2$ . Then  $m \in \mathbb{M}_2$  if and only if there exist  $u, v \in E := \{e : p_1^{\alpha_1} \nmid e, p_2^{\alpha_2} \nmid e, e \in \mathbb{Z}\}$  such that*

$u \not\equiv v \pmod{\sim m}$  and  $\det(A) = 0$ , where

$$A = \begin{pmatrix} \gamma^{s_{01}u} & \gamma^{s_{01}v} & 1 \\ \gamma^{s_{10}u} & \gamma^{s_{10}v} & 1 \\ \gamma^u & \gamma^v & 1 \end{pmatrix}. \quad (10)$$

*Proof.* If  $m \in \mathbb{M}_2$ , then there is a polynomial  $Q(X) = X^u + aX^v + b \in \mathbb{F}_{2^t}[X]$  such that the ①, ② and ③ in Lemma 3.2 are true. Due to ②, we have that  $u \not\equiv v \pmod{\sim m}$ . On the other hand, ③ is equivalent to

$$A \begin{pmatrix} 1 \\ a \\ b \end{pmatrix} = \begin{pmatrix} 0 \\ 0 \\ 0 \end{pmatrix}, \quad (11)$$

$$1 + a + b \neq 0. \quad (12)$$

Equation (11) requires that  $\det(A) = 0$ . It remains to show that  $u, v \in E$ . We show that  $p_1^{\alpha_1} \nmid u$ . The proofs for  $p_2^{\alpha_2} \nmid u, p_1^{\alpha_1} \nmid v$  and  $p_2^{\alpha_2} \nmid v$  will be similar and omitted. Note that

$$\begin{aligned} 0 &= \det(A) = (\gamma^{s_{01}u} + \gamma^u)(\gamma^{s_{10}v} + \gamma^v) + \\ &(\gamma^{s_{01}v} + \gamma^v)(\gamma^{s_{10}u} + \gamma^u) \\ &= ((\gamma^{-s_{10}u} + 1)(\gamma^{-s_{01}v} + 1) + \\ &(\gamma^{-s_{01}u} + 1)(\gamma^{-s_{10}v} + 1))\gamma^{u+v}. \end{aligned} \quad (13)$$

If  $p_1^{\alpha_1} \mid u$ , then  $s_{10}u \equiv 0 \pmod{\sim m}$  and  $\gamma^{-s_{10}u} + 1 = 0$ . Equation (13) would imply  $\gamma^{-s_{01}v} + 1 = 0$  or  $\gamma^{-s_{10}v} + 1 = 0$ . If  $\gamma^{-s_{01}v} + 1 = 0$ , then  $p_2^{\alpha_2} \mid v$  and thus  $m \mid v$ , which would contradict to ②. If  $\gamma^{-s_{10}v} + 1 = 0$ , then  $p_1^{\alpha_1} \mid v$  and thus  $0 = Q(\gamma^{s_{10}}) = 1 + a + b$ , which contradicts to (12).

Conversely, suppose that  $u, v \in E$  are integers such that  $u \not\equiv v \pmod{\sim m}$  and  $\det(A) = 0$ . To show that  $m \in \mathbb{M}_2$ , it suffices to construct an  $S_m$ -decoding polynomial  $Q(X) = X^u + aX^v + b \in \mathbb{F}_{2^t}[X]$  such that ①, ② and ③ are satisfied. First of all,  $\det(A) = 0$  implies that  $\text{rank}(A) \leq 2$ . If  $\text{rank}(A) = 1$ , then we must have that  $\gamma^{s_{01}u} = \gamma^{s_{10}u}$ . It follows that  $u \equiv 0 \pmod{\sim m}$ , which contradicts to  $u \in E$ . As  $\text{rank}(A) = 2$ , the null space of  $A$  will be one-dimensional and spanned by a nonzero vector  $c = (c_1, c_2, c_3)^T$ . Below we shall see that  $c_i \neq 0$  for all  $i \in [3]$ . If  $c_1 = 0$ , then

$$\begin{pmatrix} \gamma^{s_{01}v} & 1 \\ \gamma^{s_{10}v} & 1 \\ \gamma^v & 1 \end{pmatrix} \begin{pmatrix} c_2 \\ c_3 \end{pmatrix} = \begin{pmatrix} 0 \\ 0 \\ 0 \end{pmatrix}. \quad (14)$$

Then  $c_2c_3$  must be nonzero and thus  $\gamma^{s_{01}v} = \gamma^{s_{10}v}$ . The latter equality requires that  $v \equiv 0 \pmod{\sim m}$ , which contradicts to the fact  $v \in E$ . Hence,  $c_1 \neq 0$ . Similarly, we have  $c_2 \neq 0$  and  $c_3 \neq 0$ . Let  $R(X) = c_1X^u + c_2X^v + c_3$ . Then  $R(\gamma) = R(\gamma^{s_{01}}) = R(\gamma^{s_{10}}) = 0$ . Furthermore, we must have  $R(1) \neq 0$ . Otherwise,

$c_3 = c_1 + c_2$  and

$$\begin{pmatrix} \gamma^{s_{01}u} + 1 & \gamma^{s_{01}v} + 1 \\ \gamma^{s_{10}u} + 1 & \gamma^{s_{10}v} + 1 \\ \gamma^u + 1 & \gamma^v + 1 \end{pmatrix} \begin{pmatrix} c_1 \\ c_2 \end{pmatrix} = \begin{pmatrix} 0 \\ 0 \\ 0 \end{pmatrix}. \quad (15)$$

As  $c_1c_2 \neq 0$ , this is possible only if

$$\frac{\gamma^{s_{01}u} + 1}{\gamma^{s_{01}v} + 1} = \frac{\gamma^{s_{10}u} + 1}{\gamma^{s_{10}v} + 1} = \frac{\gamma^u + 1}{\gamma^v + 1}. \quad (16)$$

Denote by  $\lambda$  the value of the fractions in (16). Then

$$\begin{aligned} \frac{\gamma^{s_{10}u}}{\gamma^{s_{10}v}} &\sim \underbrace{\frac{\gamma^{s_{01}u} + 1}{\gamma^{s_{01}v} + 1}}_{\lambda} \sim \frac{\gamma^{s_{10}u} + \gamma^u}{\gamma^{s_{10}v} + \gamma^v} \\ &= \frac{\gamma^{s_{10}u} + 1 + \gamma^u + 1}{\gamma^{s_{10}v} + 1 + \gamma^v + 1} \\ &= \frac{\lambda(\gamma^{s_{10}v} + 1) + \lambda(\gamma^v + 1)}{\gamma^{s_{10}v} + 1 + \gamma^v + 1} \\ &= \lambda, \end{aligned} \quad (17)$$

where the first equality is based on the fact that  $s_{01} + s_{10} \equiv 1 \pmod{\sim m}$  and the second equality is true because we are working over a finite field of characteristic 2. It follows from (17) that  $\gamma^{s_{10}(u-v)} = 1$ . Therefore, we must have that  $u \equiv v \pmod{\sim p_1^{\alpha_1}}$ . Similarly, we have that  $u \equiv v \pmod{\sim p_2^{\alpha_2}}$ . Based on the two congruences, we have that  $u \equiv v \pmod{\sim m}$ , which gives a contradiction. Hence,  $R(1) \neq 0$  and  $Q(X) := R(X)/c_1$  is a polynomial satisfying ①, ②, and ③. ■

LEMMA 3.4. Let  $m = p_1^{\alpha_1}p_2^{\alpha_2} \in \mathcal{M}_2$ . Let  $t = \text{ord}_m(2)$  and let  $\gamma \in \mathbb{F}_{2^t}^*$  be a primitive  $m$ th root of unity. Let

$$\tau(z_1, z_2) = \frac{z_1 + z_2}{z_1z_2 + z_2}.$$

Then  $m \in \mathbb{M}_2$  if and only if  $\tau$  is not injective on  $\mathcal{D} = \{(z_1, z_2) \in (\mathbb{F}_{2^t}^* \setminus \{1\})^2 : \text{ord}_{2^t}(z_1) \mid p_1^{\alpha_1}, \text{ord}_{2^t}(z_2) \mid p_2^{\alpha_2}\}$ .

*Proof.* If  $m \in \mathbb{M}_2$ , then by Lemma 3.3 there exist  $u, v \in E$  such that  $u \not\equiv v \pmod{\sim m}$  and  $\det(A) = 0$ , where  $A$  is defined by (10). Note that  $\det(A) = 0$  requires that

$$\frac{\gamma^{s_{10}u} + \gamma^{s_{01}u}}{\gamma^u + \gamma^{s_{01}u}} = \frac{\gamma^{s_{10}v} + \gamma^{s_{01}v}}{\gamma^v + \gamma^{s_{01}v}}.$$

Clearly,  $(\gamma^{s_{10}u}, \gamma^{s_{01}u})$  and  $(\gamma^{s_{10}v}, \gamma^{s_{01}v})$  are two distinct elements of  $\mathcal{D}$  and  $\tau(\gamma^{s_{10}u}, \gamma^{s_{01}u}) = \tau(\gamma^{s_{10}v}, \gamma^{s_{01}v})$ . Hence,  $\tau$  is not injective on  $\mathcal{D}$ .

Conversely, suppose that  $\tau(z_1, z_2) = \tau(z'_1, z'_2)$  for two distinct elements  $(z_1, z_2), (z'_1, z'_2) \in \mathcal{D}$ . To show that  $m \in \mathbb{M}_2$ , by

Lemma 3.3 it suffices to find  $u, v \in E$  such that  $u \not\equiv v \pmod{\sim m}$  and  $\det(A) = 0$ . Suppose that

$$\begin{aligned} \text{ord}_{2^t}(z_1) &= p_1^{i_1}, \text{ord}_{2^t}(z_2) = p_2^{j_1}, \\ \text{ord}_{2^t}(z'_1) &= p_1^{i_2}, \text{ord}_{2^t}(z'_2) = p_2^{j_2} \end{aligned}$$

for  $i_1, i_2 \in [\alpha_1]$  and  $j_1, j_2 \in [\alpha_2]$ . Then there exist integers  $u_1, u_2, v_1, v_2$ , where  $p_1 \nmid u_1, v_1$  and  $p_2 \nmid u_2, v_2$ , such that

$$\begin{aligned} z_1 &= (\gamma^{s_{10}p_1^{\alpha_1-i_1}})^{u_1}, z_2 = (\gamma^{s_{01}p_2^{\alpha_2-j_1}})^{u_2}, \\ z'_1 &= (\gamma^{s_{10}p_1^{\alpha_1-i_2}})^{v_1}, z'_2 = (\gamma^{s_{01}p_2^{\alpha_2-j_2}})^{v_2}. \end{aligned}$$

By Chinese remainder theorem, there exist  $u, v$  such that:

$$\begin{cases} u \equiv p_1^{\alpha_1-i_1} u_1 \pmod{\sim p_1^{\alpha_1}}, & v \equiv p_1^{\alpha_1-i_2} v_1 \pmod{\sim p_1^{\alpha_1}}, \\ u \equiv p_2^{\alpha_2-j_1} u_2 \pmod{\sim p_2^{\alpha_2}}, & v \equiv p_2^{\alpha_2-j_2} v_2 \pmod{\sim p_2^{\alpha_2}}. \end{cases}$$

In particular,  $u, v \in E$  and  $u \not\equiv v \pmod{\sim m}$  (o.w., we will have  $(z_1, z_2) = (z'_1, z'_2)$ ). Furthermore,  $z_1 = \gamma^{s_{10}u}, z_2 = \gamma^{s_{01}u}, z'_1 = \gamma^{s_{10}v}$  and  $z'_2 = \gamma^{s_{01}v}$ . Since  $\tau(z_1, z_2) = \tau(z'_1, z'_2)$ , we must have that  $\det(A) = 0$  due to (13). ■

Let  $\rho(z_1, z_2) = \tau(z_1, z_2) - 1 = (1 + z_2^{-1})(1 + z_1^{-1})^{-1}$ . Then Lemma 3.4 gives the following theorem.

**THEOREM 3.1.** *Let  $m = p_1^{\alpha_1} p_2^{\alpha_2} \in \mathcal{M}_2$ . Let  $t = \text{ord}_m(2)$  and let  $\gamma \in \mathbb{F}_{2^t}^*$  be a primitive  $m$ th root of unity. Then  $m \in \mathbb{M}_2$  if and only if  $\rho$  is not injective on  $\mathcal{D}$ .*

Theorem 3.1 gives a characterization of the good numbers in  $\mathcal{M}_2$ . We say that  $(u, v) \in E^2$  form a collision for  $m$  if

- $\rho(\gamma^{s_{10}u}, \gamma^{s_{01}u}) = \rho(\gamma^{s_{10}v}, \gamma^{s_{01}v})$ , and
- $u \not\equiv v \pmod{\sim m}$ .

The proof of Lemma 3.4 shows that  $m \in \mathbb{M}_2$  if and only if there is a collision  $(u, v) \in E^2$  for  $m$ .

#### 4. IMPLICATIONS BETWEEN GOOD NUMBERS

In this section, we show the implications between good numbers in  $\mathcal{M}_2$ , which allows us to construct new good numbers from old.

**LEMMA 4.1.** *Let  $m_1 = p_1^{\alpha_1} p_2^{\alpha_2}, m_2 = p_1^{\beta_1} p_2^{\beta_2} \in \mathcal{M}_2$ . Let  $t_i = \text{ord}_{m_i}(2)$  and let  $\gamma_i \in \mathbb{F}_{2^{t_i}}^*$  be a primitive  $m_i$ th root of unity for  $i = 1, 2$ . If  $m_1 | m_2$ , then there is an integer  $\sigma \in \mathbb{Z}_{m_1}^*$  such that  $\gamma_1 = \gamma_2^{\sigma m_2/m_1}$ .*

*Proof.* As  $m_1 | m_2$  and  $m_2 | (2^{t_2} - 1)$ , we must have that  $t_1 | t_2$ . Then  $\mathbb{F}_{2^{t_1}}$  is a subfield of  $\mathbb{F}_{2^{t_2}}$ . Note that  $\gamma_1 \in \mathbb{F}_{2^{t_1}} \subseteq \mathbb{F}_{2^{t_2}}$  and

$\gamma_2^{m_2/m_1} \in \mathbb{F}_{2^{t_2}}$  are elements of the same finite field and have the same multiplicative order (i.e.  $m_1$ ). Both  $\langle \gamma_1 \rangle$  and  $\langle \gamma_2^{m_2/m_1} \rangle$  are subgroups of  $\mathbb{F}_{2^{t_2}}^*$  of order  $m_1$ . As  $\mathbb{F}_{2^{t_2}}^*$  has a unique subgroup of order  $m_1$ , it must be the case that  $\langle \gamma_1 \rangle = \langle \gamma_2^{m_2/m_1} \rangle$ . Hence, there is an integer  $\sigma \in \mathbb{Z}_{m_1}^*$  such that  $\gamma_1 = \gamma_2^{\sigma m_2/m_1}$ . ■

**THEOREM 4.1.** *Let  $m_1 = p_1^{\alpha_1} p_2^{\alpha_2}, m_2 = p_1^{\beta_1} p_2^{\beta_2} \in \mathcal{M}_2$ . If  $m_1 \in \mathbb{M}_2$  and  $m_1 | m_2$ , then  $m_2 \in \mathbb{M}_2$ .*

*Proof.* For  $i \in \{1, 2\}$ , let  $S_{m_i} = \{s_{01}^i, s_{10}^i, 1\}$ , let  $t_i = \text{ord}_{m_i}(2)$ , and let  $\gamma_i \in \mathbb{F}_{2^{t_i}}^*$  be of order  $m_i$ . Let  $E_1 = \{e : p_1^{\alpha_1} \nmid e, p_2^{\alpha_2} \nmid e, e \in \mathbb{Z}\}$  and  $E_2 = \{e : p_1^{\beta_1} \nmid e, p_2^{\beta_2} \nmid e, e \in \mathbb{Z}\}$ .

If  $m_1 \in \mathbb{M}_2$ , then there is a collision  $(u_1, v_1) \in E^2$  such that  $u_1 \not\equiv v_1 \pmod{\sim m_1}$  and

$$\frac{\gamma_1^{-s_{01}^1 u_1} + 1}{\gamma_1^{-s_{10}^1 u_1} + 1} = \frac{\gamma_1^{-s_{01}^1 v_1} + 1}{\gamma_1^{-s_{10}^1 v_1} + 1}. \quad (18)$$

As per Lemma 4.1, let  $\sigma \in \mathbb{Z}_{m_1}^*$  be an integer such that  $\gamma_1 = \gamma_2^{\sigma m_2/m_1}$ . Then (18) is

$$\frac{\gamma_2^{-s_{01}^1 u_1 \sigma m_2/m_1} + 1}{\gamma_2^{-s_{10}^1 u_1 \sigma m_2/m_1} + 1} = \frac{\gamma_2^{-s_{01}^1 v_1 \sigma m_2/m_1} + 1}{\gamma_2^{-s_{10}^1 v_1 \sigma m_2/m_1} + 1}. \quad (19)$$

We claim that if there exist integers  $u_2, v_2$  such that

$$(i) \begin{cases} s_{01}^1 u_1 \sigma m_2/m_1 \equiv s_{01}^2 u_2 \pmod{\sim m_2}, \\ s_{10}^1 u_1 \sigma m_2/m_1 \equiv s_{10}^2 u_2 \pmod{\sim m_2}, \end{cases}$$

$$(ii) \begin{cases} s_{01}^1 v_1 \sigma m_2/m_1 \equiv s_{01}^2 v_2 \pmod{\sim m_2}, \\ s_{10}^1 v_1 \sigma m_2/m_1 \equiv s_{10}^2 v_2 \pmod{\sim m_2}, \end{cases}$$

then  $u_2, v_2 \in E_2, u_2 \not\equiv v_2 \pmod{\sim m_2}$  and

$$\frac{\gamma_2^{-s_{01}^2 u_2} + 1}{\gamma_2^{-s_{10}^2 u_2} + 1} = \frac{\gamma_2^{-s_{01}^2 v_2} + 1}{\gamma_2^{-s_{10}^2 v_2} + 1}, \quad (20)$$

i.e.  $(u_2, v_2)$  form a collision for  $m_2$  (and thus  $m_2 \in \mathbb{M}_2$ ). Note that (20) is clear from (i), (ii) and (19). We need to show that  $u_2, v_2 \in E_2$  and  $u_2 \not\equiv v_2 \pmod{\sim m_2}$ . If  $p_1^{\beta_1} | u_2$ , then we will have that  $m_2 | s_{10}^2 u_2$ . The second congruence of (i) would imply that  $p_1^{\alpha_1} | u_1 \sigma$ , which contradicts to  $u_1 \in E_1$  and  $\sigma \in \mathbb{Z}_{m_1}^*$ . Similarly, we have  $p_2^{\beta_2} \nmid u_2, p_1^{\beta_1} \nmid v_2$  and  $p_2^{\beta_2} \nmid v_2$ . Hence,  $u_2, v_2 \in E_2$ . If  $u_2 \equiv v_2 \pmod{\sim m_2}$ , then the first congruences of (i) and (ii) would imply that  $s_{01}^1 \sigma (u_1 - v_1) \equiv 0 \pmod{\sim m_1}$ , which requires that  $u_1 \equiv v_1 \pmod{\sim p_2^{\alpha_2}}$ . Similarly, the second congruences of (i) and (ii) would imply

$u_1 \equiv v_1 \pmod{\sim p_1^{\alpha_1}}$ . It follows that  $u_1 \equiv v_1 \pmod{\sim m_1}$ , which is a contradiction.

It remains to show the existence of integers  $u_2$  and  $v_2$  that satisfy (i) and (ii). We show that existence of  $u_2$ . The existence of  $v_2$  is similar. Due to Chinese remainder theorem, the first congruence of (i) is equivalent to

$$\begin{cases} s_{01}^1 u_1 \sigma m_2 / m_1 \equiv s_{01}^2 u_2 \pmod{\sim p_1^{\beta_1}}, \\ s_{01}^1 u_1 \sigma m_2 / m_1 \equiv s_{01}^2 u_2 \pmod{\sim p_2^{\beta_2}}, \end{cases} \quad (21)$$

Note that the first congruence of (21) is always true. On the other hand, as  $s_{01}^2 \equiv 1 \pmod{\sim p_2^{\beta_2}}$ , the first congruence of (i) must be equivalent to

$$u_2 \equiv s_{01}^1 u_1 \sigma m_2 / m_1 \pmod{\sim p_2^{\beta_2}}. \quad (22)$$

Similarly, the second congruence of (i) is equivalent to

$$u_2 \equiv s_{10}^1 u_1 \sigma m_2 / m_1 \pmod{\sim p_1^{\beta_1}}. \quad (23)$$

Therefore, (i) is equivalent to the system formed by (22) and (23). The existence of  $u_2$  is an easy consequence of the Chinese remainder theorem. ■

**THEOREM 4.2.** *Let  $m_2 = p_1^{\beta_1} p_2^{\beta_2} \in \mathcal{M}_2$ . Suppose that  $m_2 \in \mathbb{M}_2$  and  $(u, v) = (p_1^{i_1} p_2^{j_2} \sigma_1, p_1^{j_1} p_2^{i_2} \sigma_2)$  is a collision for  $m_2$ , where  $\sigma_1, \sigma_2 \in \mathbb{Z}_{m_2}^*$ . Let  $\omega_1 = \min\{i_1, j_1\}$  and  $\omega_2 = \min\{i_2, j_2\}$ . Then  $m_1 := m_2 / (p_1^{\omega_1} p_2^{\omega_2})$  belongs to  $\mathbb{M}_2$ .*

*Proof.* For  $i = 1, 2$ , let  $S_{m_i} = \{s_{01}^i, s_{10}^i, 1\}$ , let  $t_i = \text{ord}_{m_i}(2)$  and let  $\gamma_i \in \mathbb{F}_{2^{t_i}}^*$  be of order  $m_i$ . Let  $E_1 = \{e : p_1^{\beta_1 - \omega_1} \nmid e, p_2^{\beta_2 - \omega_2} \nmid e, e \in \mathbb{Z}\}$  and  $E_2 = \{e : p_1^{\beta_1} \nmid e, p_2^{\beta_2} \nmid e, e \in \mathbb{Z}\}$ . To show that  $m_1 \in \mathbb{M}_2$ , it suffices to find two integers  $u_1, v_1 \in E_1$  such that  $u_1 \not\equiv v_1 \pmod{\sim m_1}$  and

$$\frac{\gamma_1^{-s_{01}^1 u_1} + 1}{\gamma_1^{-s_{10}^1 u_1} + 1} = \frac{\gamma_1^{-s_{01}^1 v_1} + 1}{\gamma_1^{-s_{10}^1 v_1} + 1}. \quad (24)$$

As per Lemma 4.1, there is an integer  $\sigma \in \mathbb{Z}_{m_2}^*$  such that  $\gamma_1 = \gamma_2^{p_1^{\omega_1} p_2^{\omega_2} \sigma}$ . Then (24) is

$$\frac{\gamma_2^{-s_{01}^1 u_1 p_1^{\omega_1} p_2^{\omega_2} \sigma} + 1}{\gamma_2^{-s_{10}^1 u_1 p_1^{\omega_1} p_2^{\omega_2} \sigma} + 1} = \frac{\gamma_2^{-s_{01}^1 v_1 p_1^{\omega_1} p_2^{\omega_2} \sigma} + 1}{\gamma_2^{-s_{10}^1 v_1 p_1^{\omega_1} p_2^{\omega_2} \sigma} + 1}. \quad (25)$$

As  $(p_1^{i_1} p_2^{j_2} \sigma_1, p_1^{j_1} p_2^{i_2} \sigma_2) \in E_2^2$  is a collision for  $m_2$ , we have

$$\frac{\gamma_2^{-s_{01}^1 p_1^{i_1} p_2^{j_2} \sigma_1} + 1}{\gamma_2^{-s_{10}^1 p_1^{i_1} p_2^{j_2} \sigma_1} + 1} = \frac{\gamma_2^{-s_{01}^1 p_1^{j_1} p_2^{i_2} \sigma_2} + 1}{\gamma_2^{-s_{10}^1 p_1^{j_1} p_2^{i_2} \sigma_2} + 1}. \quad (26)$$

We claim that if there exist integers  $u_1, v_1$  such that

$$\begin{aligned} \text{(i)} \quad & \begin{cases} s_{01}^1 u_1 p_1^{\omega_1} p_2^{\omega_2} \sigma \equiv s_{01}^2 p_1^{i_1} p_2^{j_2} \sigma_1 \pmod{\sim m_2}, \\ s_{10}^1 u_1 p_1^{\omega_1} p_2^{\omega_2} \sigma \equiv s_{10}^2 p_1^{j_1} p_2^{i_2} \sigma_1 \pmod{\sim m_2}, \end{cases} \\ \text{(ii)} \quad & \begin{cases} s_{01}^1 v_1 p_1^{\omega_1} p_2^{\omega_2} \sigma \equiv s_{01}^2 p_1^{j_1} p_2^{i_2} \sigma_2 \pmod{\sim m_2}, \\ s_{10}^1 v_1 p_1^{\omega_1} p_2^{\omega_2} \sigma \equiv s_{10}^2 p_1^{i_1} p_2^{j_2} \sigma_2 \pmod{\sim m_2}, \end{cases} \end{aligned}$$

then  $u_1, v_1 \in E_1$ ,  $u_1 \not\equiv v_1 \pmod{\sim m_1}$  and (25) holds. Note that (25) is clear from (i), (ii) and (26). If  $p_1^{\beta_1 - \omega_1} | u_1$ , then the second congruence of (i) would imply that  $p_1^{i_1} p_2^{j_2} \sigma_1 \in E_2$ . Similarly, we can show that  $p_2^{\beta_2 - \omega_2} \nmid u_1, p_1^{\beta_1 - \omega_1} \nmid v_1$  and  $p_2^{\beta_2 - \omega_2} \nmid v_1$ . Therefore,  $u_1, v_1 \in E_1$ . If  $u_1 \equiv v_1 \pmod{\sim m_1}$ , then the first congruences of (i) and (ii) would imply that  $s_{01}^2 (p_1^{i_1} p_2^{j_2} \sigma_1 - p_1^{j_1} p_2^{i_2} \sigma_2) \equiv 0 \pmod{\sim m_2}$ , which requires that  $p_1^{i_1} p_2^{j_2} \sigma_1 \equiv p_1^{j_1} p_2^{i_2} \sigma_2 \pmod{\sim p_2^{\beta_2}}$ . Similarly, the second congruences of (i) and (ii) require that  $p_1^{i_1} p_2^{j_2} \sigma_1 \equiv p_1^{j_1} p_2^{i_2} \sigma_2 \pmod{\sim p_1^{\beta_1}}$ . It follows that  $p_1^{i_1} p_2^{j_2} \sigma_1 \equiv p_1^{j_1} p_2^{i_2} \sigma_2 \pmod{\sim m_2}$ , which is a contradiction.

It remains to show the existence of  $u_1$  and  $v_1$  that satisfy (i) and (ii). We show the existence of  $u_1$ . The existence of  $v_1$  is similar and omitted. As  $\omega_1 \leq i_1 \leq \beta_1$  and  $\omega_2 \leq i_2 \leq \beta_2$ , the first congruence in (i) is equivalent to

$$\begin{cases} s_{01}^1 u_1 \sigma \equiv s_{01}^2 p_1^{i_1 - \omega_1} p_2^{j_2 - \omega_2} \sigma_1 \pmod{\sim p_1^{\beta_1 - \omega_1}}, \\ s_{10}^1 u_1 \sigma \equiv s_{10}^2 p_1^{i_1 - \omega_1} p_2^{j_2 - \omega_2} \sigma_1 \pmod{\sim p_2^{\beta_2 - \omega_2}}. \end{cases} \quad (27)$$

Note that the first congruence of (27) is always true. On the other hand, as  $p_2 \nmid s_{01}^1 \sigma$ , there is an integer  $t_{01}^1$  such that  $s_{01}^1 \sigma t_{01}^1 \equiv 1 \pmod{\sim p_2^{\beta_2 - \omega_2}}$ . Therefore, the first congruence of (i) will be equivalent to

$$u_1 \equiv s_{01}^2 t_{01}^1 p_1^{i_1 - \omega_1} p_2^{j_2 - \omega_2} \sigma_1 \pmod{\sim p_2^{\beta_2 - \omega_2}}. \quad (28)$$

Similarly, we can show that the second congruence of (i) is equivalent to

$$u_1 \equiv s_{10}^2 t_{10}^1 p_1^{i_1 - \omega_1} p_2^{j_2 - \omega_2} \sigma_1 \pmod{\sim p_1^{\beta_1 - \omega_1}}, \quad (29)$$

where  $t_{10}^1$  is an integer such that  $s_{10}^1 \sigma t_{10}^1 \equiv 1 \pmod{\sim p_1^{\beta_1 - \omega_1}}$ . The existence of  $u_1$  is an easy consequence of the Chinese remainder theorem on (28) and (29). ■

**EXAMPLE 1.** Let  $m_2 = 7^2 \times 151$ . Then  $S_{m_2} = \{s_{01} = 1813, s_{10} = 5587, s_{11} = 1\}$ . Let  $t_2 = \text{ord}_{m_2}(2)$  and let  $\gamma_2 \in \mathbb{F}_{2^{t_2}}^*$  be a primitive  $m_2$ th root of unity. Then (238, 455) is a collision for  $m_2$ . Clearly,  $\omega_1 = 1$  and  $\omega_2 = 0$ . Then  $m_1 = m_2 / 7 = 1057$  must be a good number, which is  $< m_2$ .

## 5. CONCLUSION

In this paper, we characterized the good numbers in  $\mathcal{M}_2$  and showed two implications between good numbers in  $\mathcal{M}_2$ . In particular, the second implication requires an additional condition. It is an interesting problem to remove the condition.

## DATA AVAILABILITY STATEMENT

No new data were generated or analysed in support of this research.

## ACKNOWLEDGEMENTS

The authors would like to thank the anonymous reviewers for their helpful suggestions.

## FUNDING

Natural Science Foundation of Shanghai (21ZR1443000); Singapore Ministry of Education (RG12/19).

## REFERENCES

- [1] Katz, J. and Trevisan, L. (2000) On the Efficiency of Local Decoding Procedures for Error-Correcting Codes. In Yao, F., Luks, E.M. (eds) *Proc. 32nd Annual ACM SIGACT Symposium on Theory of Computing, STOC 2000*, Portland, OR, USA, May 21–23, 2000, pp. 80–86. ACM, New York.
- [2] Gasarch, W. (2004) A survey on private information retrieval. *Bulletin of the EATCS*, 82, 72–107.
- [3] Trevisan, L. (2004) Some Applications of Coding Theory in Computational Complexity. *Electronic Colloquium on Computational Complexity*, 11, No. 043.
- [4] Goldreich, O., Karloff, H.J., Schulman, L.J. and Trevisan, L. (2006) Lower bounds for linear locally decodable codes and private information retrieval. *Comput. Complex.*, 15, 263–296.
- [5] Woodruff, D.P. (2007) New Lower Bounds for General Locally Decodable Codes. *Electronic Colloquium on Computational Complexity*, 14, No. 006.
- [6] Yekhanin, S. (2008) Towards 3-query locally decodable codes of subexponential length. *J. ACM*, 55, 1:1–1:16.
- [7] Efremenko, K. (2012) 3-query locally decodable codes of subexponential length. *SIAM J. Comput.*, 41, 1694–1703.
- [8] Dvir, Z., Gopalan, P. and Yekhanin, S. (2011) Matching vector codes. *SIAM J. Comput.*, 40, 1154–1178.
- [9] Itoh, T. and Suzuki, Y. (2010) Improved constructions for query-efficient locally decodable codes of subexponential length. *IEICE Trans. Inf. Syst.*, E93–D, 263–270.
- [10] Chee, Y.M., Feng, T., Ling, S., Wang, H. and Zhang, L.F. (2013) Query-efficient locally decodable codes of subexponential length. *Comput. Complex.*, 22, 159–189.
- [11] Grolmusz, V. (2000) Superpolynomial size set-systems with restricted intersections mod 6 and explicit Ramsey graphs. *Combinatorica*, 20, 71–86.
